# Supplementary material for: Ionic liquid-assisted synthesis of Ag/Ag2Te nanocrystals via a hydrothermal route for enhanced photocatalytic performance
Source: Royal Society of Chemistry journal article supplement (doi:10.1039/c7nj03295a), 2017-01-01
Supplement: c7nj03295a1.pdf [file c7nj03295a1.pdf]

**Supplementary Information for**

**Ionic-liquid assisted synthesis of Ag/Ag<sub>2</sub>Te nanocrystals via hydrothermal route for enhanced photocatalytic performance**

Neeraj Kumar\*<sup>1</sup>, Suprakas Sinha Ray<sup>1,2</sup>, Jane Catherine Ngila\*<sup>1</sup>

<sup>1</sup>*Department of Applied Chemistry, University of Johannesburg, Doornfontein 2028, South Africa*

<sup>2</sup>*DST-CSIR National Centre for Nanostructured Materials, Council for Scientific and Industrial Research, Pretoria 0001, South Africa*

**\*Corresponding author:**

*E-mail Address:* [yнк.neeraj@gmail.com](mailto:yнк.neeraj@gmail.com) (Neeraj Kumar), [jcngila@uj.ac.za](mailto:jcngila@uj.ac.za) (J. C. Ngila)

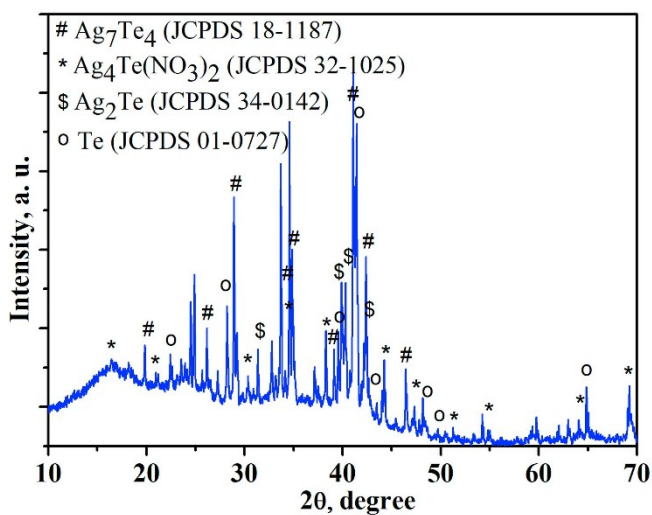

**Fig. S1** XRD pattern of as-prepared sample in absence of ionic liquid

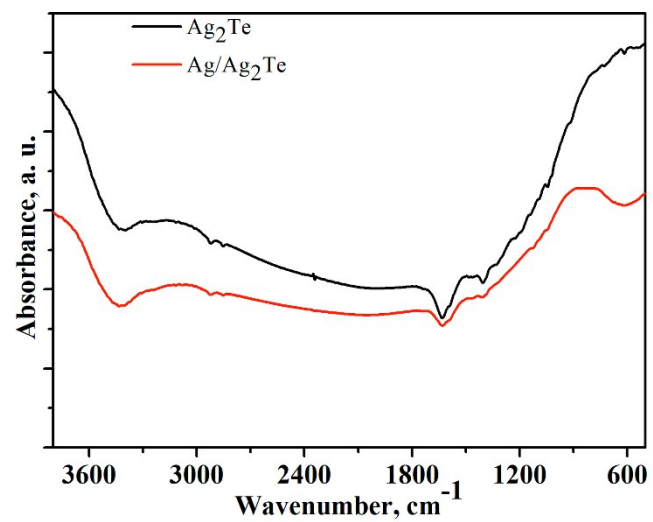

**Fig. S2** FTIR spectrum of Ag<sub>2</sub>Te and Ag/Ag<sub>2</sub>Te nanocrystals in presence of ionic liquid
